# Supplementary material for: Corrosion-Engineered Morphology and Crystal Structure Regulation toward Fe-Based Efficient Oxygen Evolution Electrodes
Source: MDPI journal article supplement (doi:10.3390/nano12121975), 2022-06-08
Supplement: s1 [file s1]

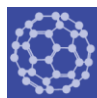

## Supplementary Materials

# Corrosion-Engineered Morphology and Crystal Structure Regulation toward Fe-Based Efficient Oxygen Evolution Electrodes

Ying Wang <sup>1,\*</sup>, Zhengbang Yang <sup>1,†</sup>, Zhonghua Zhang <sup>2</sup> and Ming He <sup>1,\*</sup>

<sup>1</sup> State Key Laboratory of Biobased Material and Green Papermaking, Qilu University of Technology (Shandong Academy of Sciences), Jinan 250353, China; y18895787269@163.com

<sup>2</sup> Key Laboratory for Liquid-Solid Structural Evolution and Processing of Materials (Ministry of Education), School of Materials Science and Engineering, Shandong University, Jinan 250061, China; zh\_zhang@sdu.edu.cn

\* Correspondence: wangying93@qlu.edu.cn (Y.W.); heming8916@qlu.edu.cn (M.H.)

† These authors have contributed equally to this work.

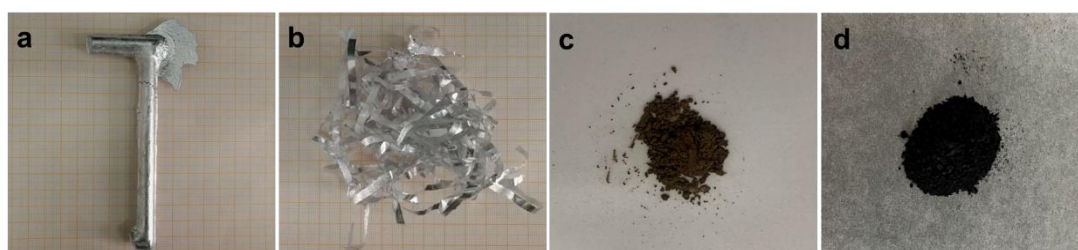

**Figure S1.** Photographs of (a) Al<sub>8</sub>Fe<sub>2</sub> alloy ingot, (b) Al<sub>8</sub>Fe<sub>2</sub> alloy ribbons, and as-obtained powders after dealloying in (c) 2 or (d) 5 M NaOH solutions.

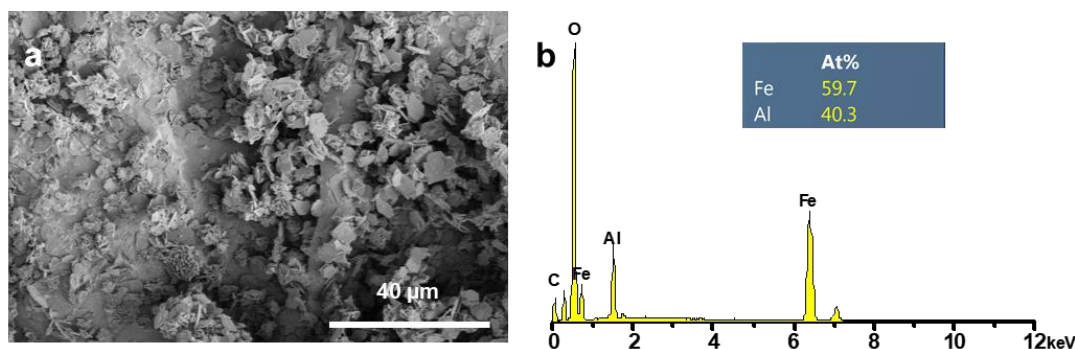

**Figure S2.** (a) SEM image and (b) typical EDX spectrum of the FeAl-LDH nanosheets. The corresponding compositions are listed in Figure S2b.

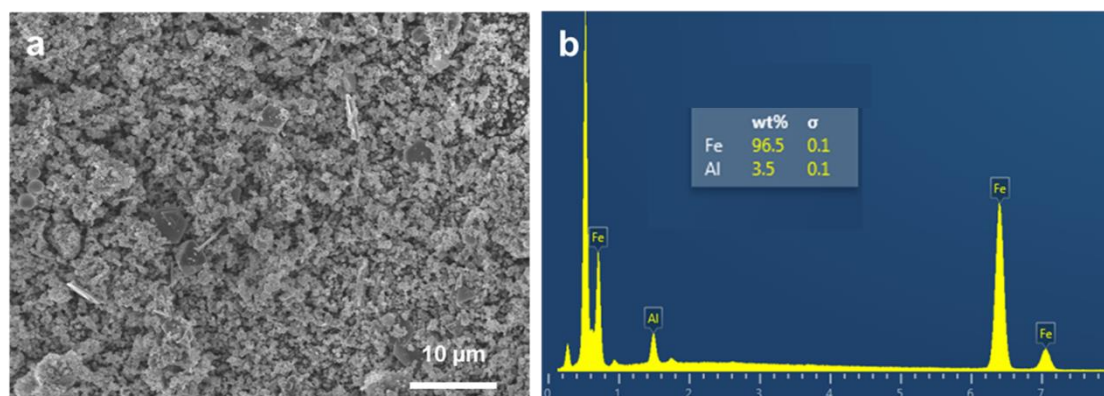

**Figure S3.** (a) SEM image and (b) typical EDX spectrum of the  $\text{Fe}_3\text{O}_4$  nanooctahedrons. The corresponding compositions are listed in Figure S3b.

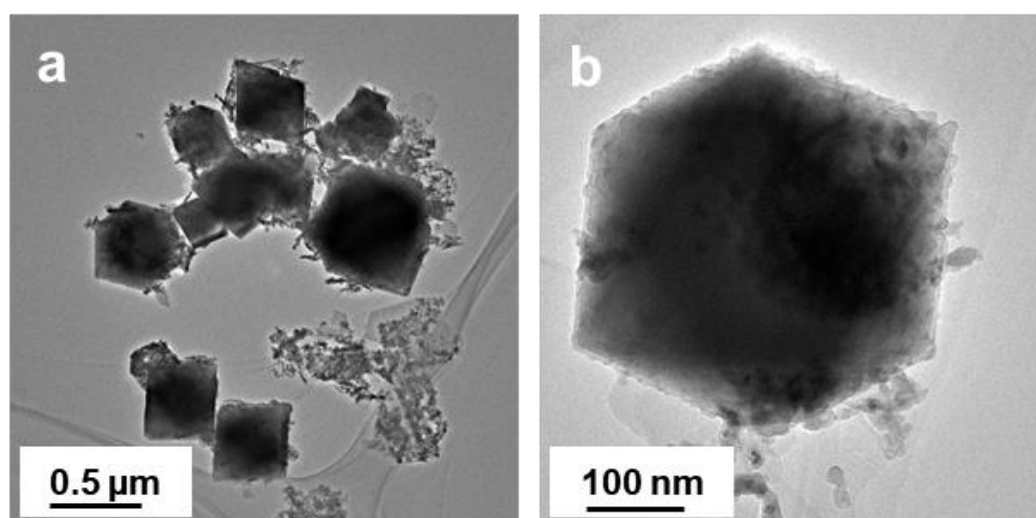

**Figure S4.** TEM images of  $\text{Fe}_3\text{O}_4$  nanooctahedrons.

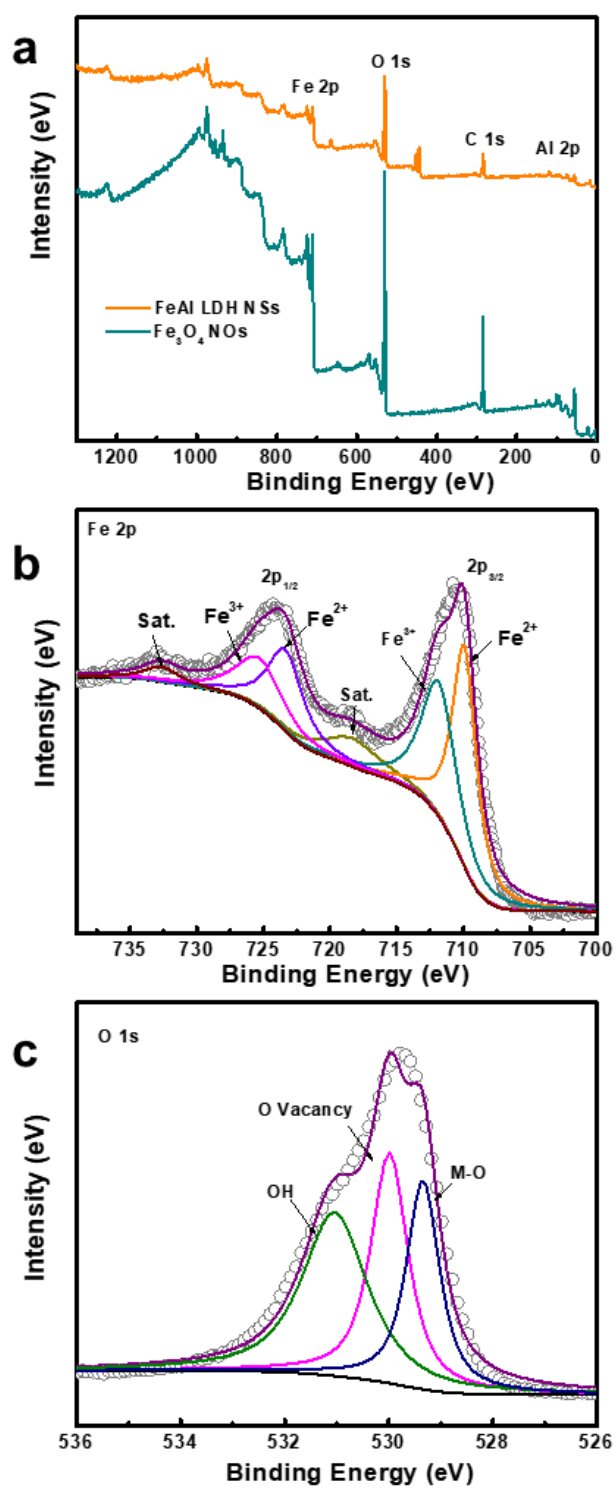

**Figure S5.** (a) XPS survey spectra of FeAl-LDH nanosheets and Fe<sub>3</sub>O<sub>4</sub> nanooctahedrons (b) Fe 2p and (c) O 1s spectra of Fe<sub>3</sub>O<sub>4</sub> nanooctahedrons.

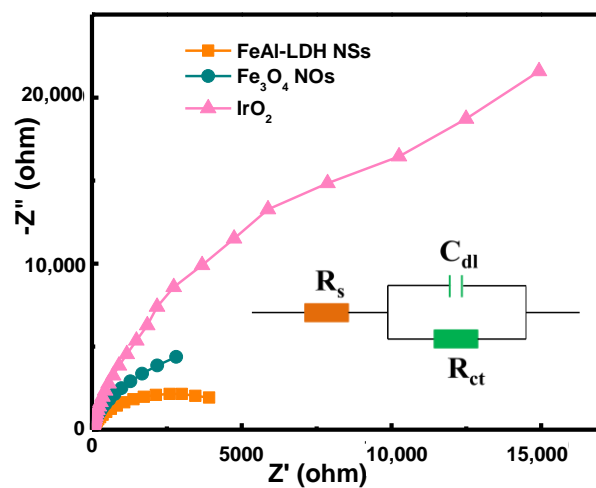

Figure S6. Nyquist diagrams of the catalysts loaded on GCE in 1 M KOH.

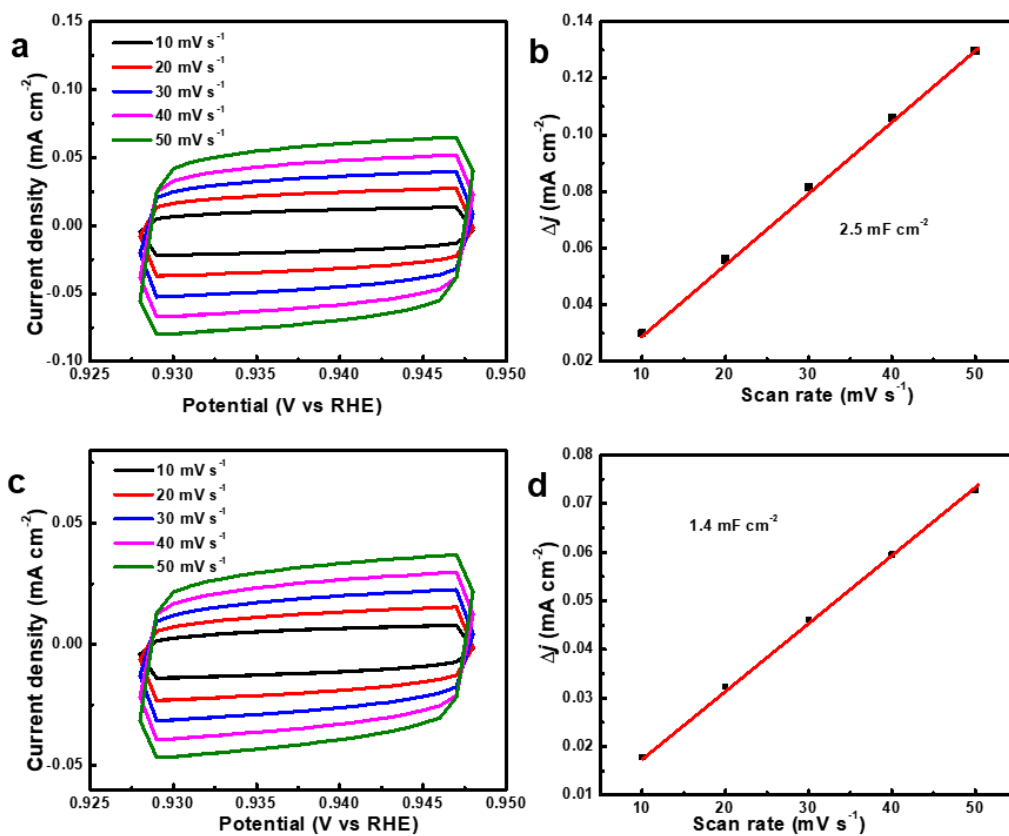

Figure S7. CVs and linear fit of the capacitive current vs scan rates for (a,b) FeAl-LDH NSs and (c,d)  $\text{Fe}_3\text{O}_4$  NOs at scan rates of 5, 10, 20, 30, 40, and 50  $\text{mV s}^{-1}$ .

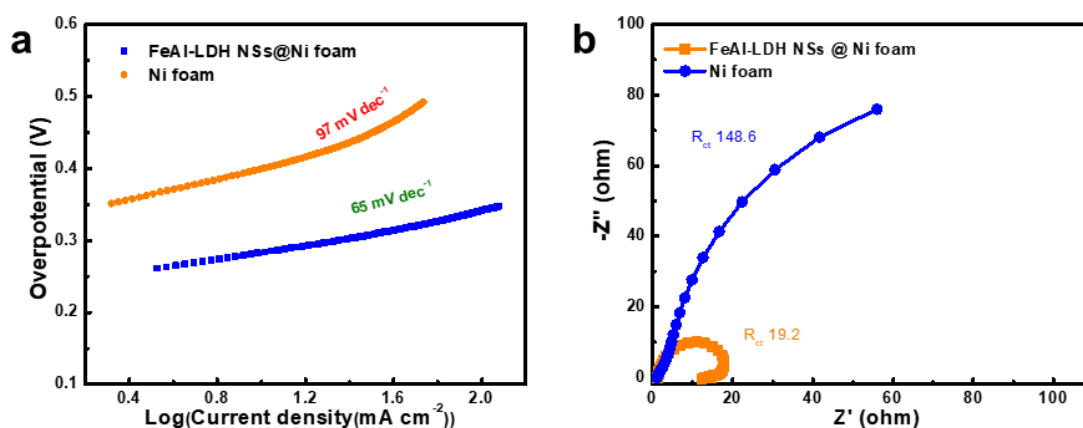

**Figure S8.** (a) Tafel slopes and (b) Nyquist diagrams of the FeAl-LDH NSs@Ni foam electrode and bare Ni foam electrode in 1 M KOH.

**Table S1.** Comparisons of OER activities of FeAl-LDH nanosheets with those of recently reported Fe-based OER catalysts.

| Catalyst                                                     | Electrolyte | $\eta_{10}$ (mV) | Tafel (mV dec <sup>-1</sup> ) | Refs.     |
|--------------------------------------------------------------|-------------|------------------|-------------------------------|-----------|
| FeAl-LDH nanosheets                                          | 1.0 M KOH   | 333              | 36                            | This work |
| (Fe,Co)-SA/CS                                                | 0.1 M KOH   | 360              | 109.6                         | [1]       |
| LaCo <sub>0.1</sub> Fe <sub>0.9</sub> O <sub>3</sub>         | 1.0 M KOH   | 452              | N/A                           | [2]       |
| MnFe <sub>2</sub> O <sub>4</sub> /Ni foam                    | 1.0 M KOH   | 310              | 65                            | [3]       |
| Fe/Fe <sub>3</sub> C-N-CNT                                   | 1.0 M KOH   | 340              | 78                            | [4]       |
| Fe-36 at% Mn                                                 | 0.1 M KOH   | 510              | 88                            | [5]       |
| CPF/FeCoO <sub>x</sub> -Nanoparticles                        | 0.1 M KOH   | 400              | 28                            | [6]       |
| Ni-Fe NPs/Fe                                                 | 1.0 M KOH   | 319              | 41.2                          | [7]       |
| Fe-CoxP                                                      | 1.0 M KOH   | 300              | 49                            | [8]       |
| Fe <sub>3</sub> C/CoFe <sub>2</sub> O <sub>4</sub> @CNFs-1.5 | 1.0 M KOH   | 340              | 128.4                         | [9]       |
| CoFe LDHs/Ni foam                                            | 1.0 M KOH   | 300              | 53                            | [10]      |

## References

- Jose, V.; Hu, H.; Edison, E.; Manalastas Jr, W.; Ren, H.; Kidkhunthod, P.; Sreejith, S.; Jayakumar, A.; Nsanzimana, J. M. V.; Srinivasan, M. et al. Modulation of Single Atomic Co and Fe Sites on Hollow Carbon Nanospheres as Oxygen Electrodes for Rechargeable Zn-Air Batteries. *Small Methods* **2021**, *5*, 2000751.
- Füngerlings, A.; Koul, A.; Dreyer, M.; Rabe, A.; Morales, D. M.; Schuhmann, W.; Behrens, M.; Pentcheva, R. Synergistic Effects of Co and Fe on the Oxygen Evolution Reaction Activity of LaCo<sub>0.1</sub>Fe<sub>0.9</sub>O<sub>3</sub>. *Chem.-Eur. J.* **2021**, *27*, 17145–17158.
- Kim, J.; Lee, J.; Liu, C.; Pandey, S.; Woo Joo, S.; Son, N.; Kang, M. Achieving a long-term stability by self-redox property between Fe and Mn ions in the iron-manganese spinel structured electrode in oxygen evolution reaction. *Appl. Surf. Sci.* **2021**, *546*, 149124.
- Zong, L.; Chen, X.; Dou, S.; Fan, K.; Wang, Z.; Zhang, W.; Du, Y.; Xu, J.; Jia, X.; Zhang, Q. et al. Stable confinement of Fe/Fe<sub>3</sub>C in Fe, N-codoped carbon nanotube towards robust zinc-air batteries. *Chinese Chem. Lett.* **2021**, *32*, 1121–1126.
- Konno, Y.; Yamamoto, T.; Nagayama, T. Nanoporous manganese ferrite films by anodising electroplated Fe-Mn alloys for bifunctional oxygen electrodes. *Nanoscale*, **2021**, *13*, 12738–12749.
- Sha, Q.; Wang, J.; Lu, Y.; Zhao, Z. Polyaniline@MOF fiber derived Fe-Co oxide-based high performance electrocatalyst. *New J. Chem.* **2021**, *45*, 282–287.
- Xue, R.; Guo, M.; Wei, Z.; Zhang, Q. Deep eutectic solvent-induced synthesis of Ni-Fe catalyst with excellent mass activity and stability for water oxidation. *Green Energy Environ.* **2021**, in press. <https://doi.org/10.1016/j.gee.2021.11.006>.
- Song, W.; Teng, X.; Niu, Y.; Gong, S.; He, X.; Chen, Z. Self-templating construction of hollow Fe-CoxP nanospheres for oxygen evolution reaction. *Chem. Eng. J.* **2021**, *409*, 128227.
- Sun, Y.; Li, Y.; You, S.; Li, X.; Zhang, Y.; Cai, Z.; Liu, M.; Ren, N.; Zou, J. Fe<sub>3</sub>C/CoFe<sub>2</sub>O<sub>4</sub> nanoparticles wrapped in one-dimensional MIL-53(Fe)-derived carbon nanofibers as efficient dual-function oxygen catalysts. *Chem. Eng. J.* **2021**, *424*, 130460.
- Liu, R.; Wang, Y.; Liu, D.; Zou, Y.; Wang, S. Water-Plasma-Enabled Exfoliation of Ultrathin Layered Double Hydroxide Nanosheets with Multivacancies for Water Oxidation. *Adv. Mater.* **2017**, *29*, 1701546.
